# Supplementary material
Source: PubMed Central journal article supplement (PMC153633)

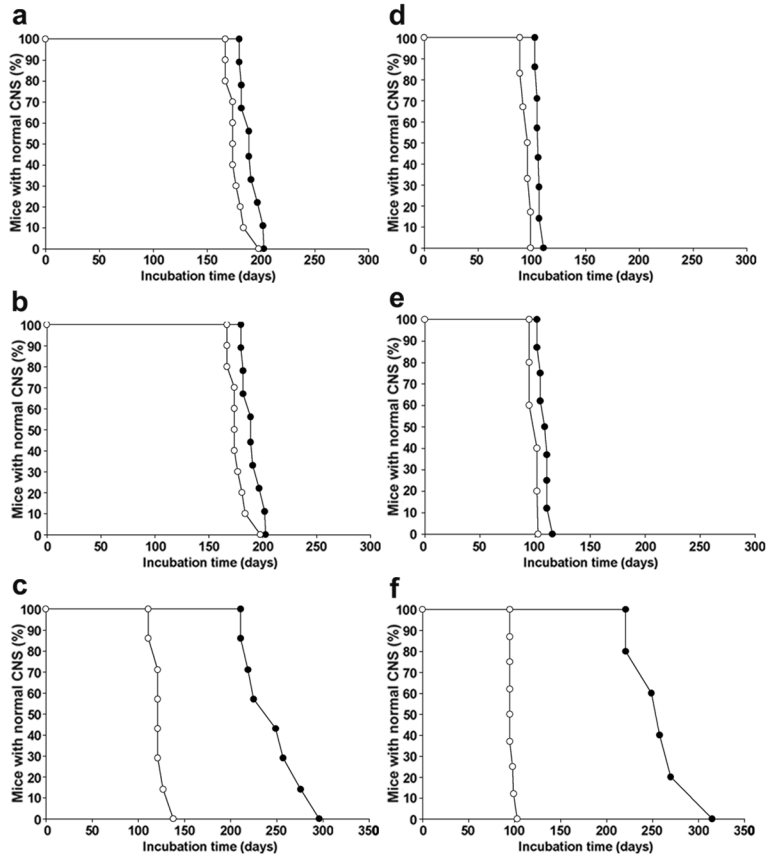

Supplement: pnas_2627989100_2.pdf [file pnas_2627989100_2.pdf]
